# Supplementary material for: Staphylococcus aureus entanglement in self-assembling β-peptide nanofibres decorated with vancomycin
Source: PubMed Central journal article supplement (PMC9419598; doi:10.1039/d0na01018a), 2021-03-24
Supplement: NA-003-D0NA01018A-s001.pdf [file NA-003-D0NA01018A-s001.pdf]

Electronic Supplementary Information (ESI)

***Staphylococcus aureus* entanglement in self-assembling  $\beta$ -peptide nanofibres decorated with vancomycin**

*Jennifer A. E. Payne*<sup>1,2,3</sup>, *Ketav Kulkarn*<sup>4</sup>, *Thierry Izore*<sup>1,2</sup>, *Alex J. Fulcher*<sup>5</sup>, *Anton Y. Peleg*<sup>6</sup>, *Marie-Isabel Aguilar*<sup>4</sup>, *Max J. Cryle*<sup>1,2,3</sup>, *Mark P. Del Borgo*<sup>7</sup>

<sup>1</sup> Infection and Immunity Program, The Monash Biomedicine Discovery Institute, Department of Biochemistry and Molecular Biology, Monash University, Clayton, Victoria 3800, Australia.

<sup>2</sup> EMBL Australia, Monash University, Clayton, Victoria 3800, Australia

<sup>3</sup> The ARC Centre of Excellence for Innovations in Peptide and Protein Science, Monash University, Clayton, Victoria 3800, Australia

<sup>4</sup> Department of Biochemistry and Molecular Biology, Monash University, Clayton, Victoria 3800, Australia.

<sup>5</sup> Monash Micro Imaging, Monash University, Clayton, Victoria, 3800, Australia

<sup>6</sup> Infection and Immunity Program, Monash Biomedicine Discovery Institute and Department of Microbiology, Monash University, Clayton, Victoria, 3800, Australia and Department of Infectious Diseases, The Alfred Hospital and Central Clinical School, Monash University, Melbourne, Victoria, 3004, Australia.

<sup>7</sup> Department of Pharmacology, Monash University, Clayton, Victoria 3800, Australia.

**Table of Contents**

|                                                                          |    |
|--------------------------------------------------------------------------|----|
| <b>Synthesis</b>                                                         | 2  |
| <b>Synthesis of vancomycin <math>\beta</math>-peptide conjugate</b>      | 2  |
| <b>Synthesis of functional lipidated tri-<math>\beta</math>-peptides</b> | 4  |
| <b>Synthesis of Lys-D-Ala-D-Ala variant</b>                              | 6  |
| <b>Peptide characterisation data</b>                                     | 7  |
| <b><sup>1</sup>H NMR Spectra</b>                                         | 7  |
| <b>Mass Spectra</b>                                                      | 11 |
| <b>HPLC traces</b>                                                       | 14 |
| <b>Video Files</b>                                                       | 15 |

## Synthesis

### Synthesis of vancomycin $\beta$ -peptide conjugate

#### Propargyl amide vancomycin (1)

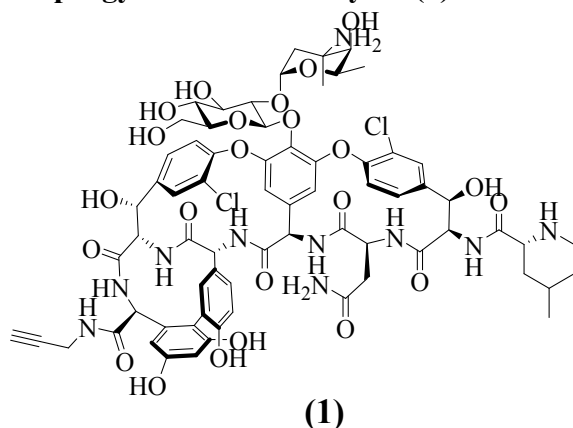

To vancomycin hydrochloride (1 g, 0.67 mmol) in anhydrous DMF (10 mL) was added DIPEA (~470  $\mu$ L, 2.7 mmol), COMU (600 mg, 1.4 mmol) and propargyl amine (135  $\mu$ L, 2.1 mmol). The reaction was stirred overnight at room temperature. The reaction mixture was then concentrated under vacuum and the residue was dissolved in 30% aq.  $\text{CH}_3\text{CN}$  (60 mL). The crude product was purified by injecting the sample (~7.5 mL) onto a reverse-phase preparative column, eluted over a 55 min gradient from 0 to 50 % solvent B, (solvent A: 0.1 % TFA/ $\text{H}_2\text{O}$ ; solvent B: 0.1 % TFA/ $\text{CH}_3\text{CN}$ ) with a flow rate of 6 mL/min. The fractions were collected and analysed for purity by injecting the samples onto a reverse-phase analytical column, eluted over a 45 min gradient from 0 to 45 % solvent B, with a flow rate of 1 mL/min. The pure fractions were pooled to provide the propargyl amide vancomycin trifluoroacetate **1** (180 mg, 19 % yield) after the recovery of starting material (100 mg).

#### Synthesis of tri $\beta$ -peptide Ac $\beta$ SerAzAlaOH (2)

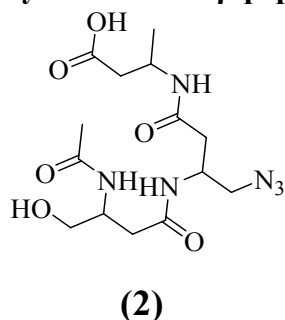

The peptide was synthesised on a 0.25 mmol scale using standard Fmoc chemistry on Wang resin. The resin was swollen in DMF (2 mL) and then soaked in Fmoc-protected  $\beta$  amino acid (2.1 eq. to resin loading), dissolved in DMF (2 mL) along with HBTU (2 eq. to resin loading),

HOBt (2 eq. to resin loading), DMAP (10 mol %) and DIPEA (4 eq. to resin loading), overnight with gentle agitation. The resin was thoroughly washed with DMF (3 x 4 mL) and the Fmoc protecting group on the amino acid was removed by soaking the resin twice in 20 % piperidine, with 0.1 M HOBt, in DMF (4 mL) for 15 minutes each. The resin was washed with DMF (3 x 4 mL), soaked in Fmoc-protected amino acid (2.1 eq. to resin loading), dissolved in DMF (4 mL) along with HBTU (2 eq. to resin loading), HOBt (2 eq. to resin loading) and DIPEA (4 eq. to resin loading), for 2 hours.  $\beta$  Peptide elongation cycle was then repeated until the sequence was complete. After removing the terminal Fmoc protecting group on the peptide, the resin was treated with a solution of 10 % v/v acetic anhydride and 2.5 % v/v DIPEA in DMF (4 mL) for 30 minutes to afford an acetyl-capped N-terminus. The resin was washed with DMF (2 x 4 mL), CH<sub>2</sub>Cl<sub>2</sub> (2 x 4 mL), Et<sub>2</sub>O (2 x 4 mL) and air dried. Cleavage was performed on the resin (0.25 mmol), by treating the resin with a cleavage solution (10 mL) comprising of H<sub>2</sub>O (2.5 % v/v), triisopropylsilane (2.5 % v/v) in CF<sub>3</sub>COOH, for 2 hours. CF<sub>3</sub>COOH was then evaporated under a stream of N<sub>2</sub> and the peptide was precipitated by addition of Et<sub>2</sub>O (50 mL). The precipitate was filtered and dissolved in 50 % aqueous CH<sub>3</sub>CN for lyophilisation. The peptide was redissolved in H<sub>2</sub>O (5 mL) and purified by injecting the sample onto a reverse-phase preparative column, eluted over a 55 min gradient from 0 to 40 % solvent B, (solvent A: 0.1 % TFA/H<sub>2</sub>O; solvent B: 0.1 % TFA/CH<sub>3</sub>CN) with a flow rate of 6 mL/min. The fractions were analysed for purity by injecting the samples onto a reverse-phase analytical column, eluted over a 45 min gradient from 0 to 25 % solvent B, with a flow rate of 1 mL/min. Pure fractions were pooled to afford peptide Ac $\beta$ SerAzAlaOH **2** (40 mg, 43 % yield).

### Synthesis of clicked product Ac $\beta$ SerAz(Vancomycin) $\beta$ AlaOH (**3**)

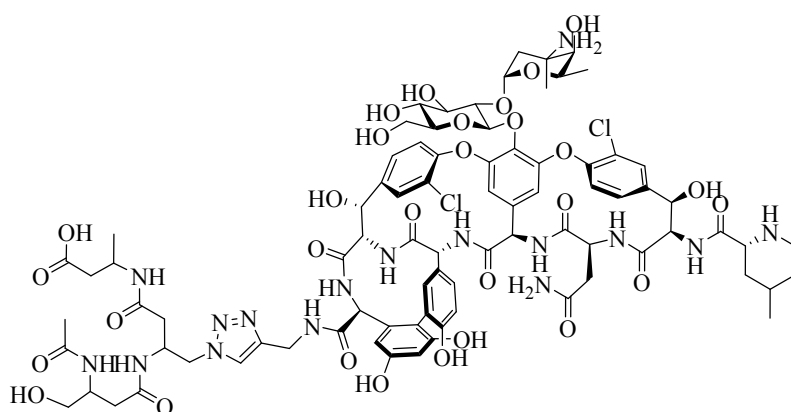

H<sub>2</sub>O (7.5 mL) and CH<sub>3</sub>CN (0.5 mL) was degassed with argon for 5 min. To this was added NaHCO<sub>3</sub> (32 mg) ascorbic acid (26 mg), propargyl vancomycin trifluoroacetate **1** (24 mg,

15  $\mu\text{mol}$ ) and Ac $\beta$ SerAzAlaOH **2** (7 mg, 19  $\mu\text{mol}$ ). CuSO<sub>4</sub>.5H<sub>2</sub>O (16 mg, 64  $\mu\text{mol}$ ) was then added to the reaction solution and vortexed until completely dissolved. The reaction was gently agitated for 60 min. The crude product was purified by injecting it onto a reverse-phase preparative column, eluted over a 55 min gradient from 0 to 55 % solvent B, (solvent A: 0.1 % TFA/H<sub>2</sub>O; solvent B: 0.1 % TFA/CH<sub>3</sub>CN) with a flow rate of 6 mL/min. The fractions were collected and analysed for purity by reverse-phase analytical HPLC, eluted over a 45 min gradient from 0 to 45 % solvent B, with a flow rate of 1 mL/min. Pure fractions were pooled to provide Ac $\beta$ SerineTriazole(Vancomycin) $\beta$ Alanine trifluoroacetate **3** (21 mg, 71 % yield).

### Synthesis of functional lipidated tri- $\beta$ -peptides

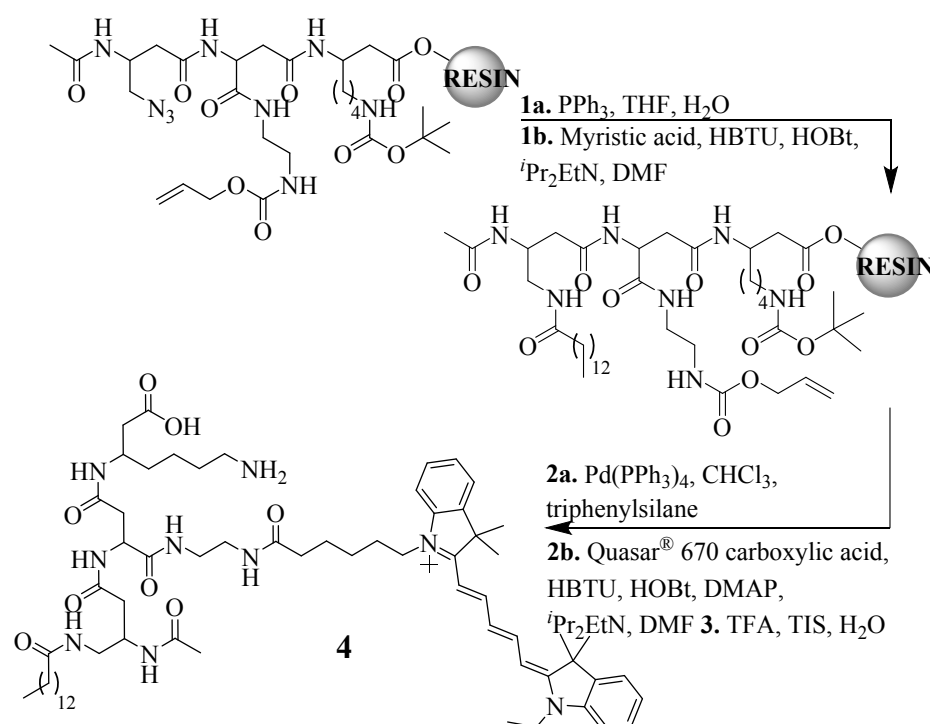

**Scheme S1:** Synthesis of lipidated tri  $\beta$ -peptide conjugated to fluorophore Ac $\beta$ AlaC14Cy5 $\beta$ LysOH (**4**)

The peptide was synthesised on a 0.1 mmol scale using standard Fmoc chemistry on chlorotriptyl resin (0.3 mmol/g loading). The resin was swollen in DCM (2 mL) and then soaked in Fmoc-protected  $\beta$  amino acid (2 eq. to resin loading), dissolved in DCM (2 mL) along with DIPEA (3 eq. to resin loading), overnight with gentle agitation. The resin was thoroughly washed with DMF (3 x 3 mL) and the Fmoc protecting group on the amino acid was removed by soaking the resin twice in 20 % piperidine, with 0.1 M HOBT, in DMF (3 mL) for 15 minutes each. The resin was washed with DMF (3 x 3 mL), soaked in Fmoc-protected amino acid (3 eq. to resin loading), dissolved in DMF (3 mL) along with HBTU (3 eq. to resin loading), HOBT (3 eq. to resin loading) and DIPEA (4 eq. to resin loading), for 2 hours.  $\beta$  Peptide elongation cycle was

then repeated until the sequence was complete. After removing the terminal Fmoc protecting group on the peptide, the resin was treated with a solution of 10 % v/v acetic anhydride and 2.5 % v/v DIPEA in DMF (4 mL) for 30 minutes to afford an acetyl-capped N-terminus. The resin was washed with DMF (2 x 3 mL), CH<sub>2</sub>Cl<sub>2</sub> (2 x 3 mL), Et<sub>2</sub>O (2 x 4 mL), air dried for 10 minutes, and transferred to a 50 mL vial for further manipulation.

Derivatisation of the *N*-acetyl β<sup>3</sup>-tripeptide, on solid support, was preceded by the reduction of the azido-alanine residue on the β<sup>3</sup>-peptide. The resin (0.1 mmol) was swollen in THF (2.5 mL) and then soaked in a solution of PPh<sub>3</sub> (4 eq. to resin loading), in THF (2 mL) and H<sub>2</sub>O (50 μL), overnight with gentle agitation. The resin was filtered through a sintered glass funnel and washed with THF (2 x 3 mL) and DMF (2 x 3 mL). The resin was soaked in myristic acid (3 eq. to resin loading), dissolved in DMF (4 mL) along with HBTU (3 eq. to resin loading), HOBt (3 eq. to resin loading) and DIPEA (4 eq. to resin loading), for 1 h. The resin was subsequently washed with DMF (2 x 3 mL), CH<sub>2</sub>Cl<sub>2</sub> (2 x 3 mL), Et<sub>2</sub>O (2 x 4 mL), air dried for 10 min and continued with further chemical manipulation to afford AcβAlaC14Cy5βLysOH (**4**) or cleaved to afford AcβAlaC14βLysβAlaOH (**5**).

To a 50 mL vial was added CHCl<sub>3</sub> (10 mL) which was rigorously degassed by bubbling a stream of argon. A portion of the degassed CHCl<sub>3</sub> (~2 mL) was then used to swell the resin (0.1 mmol), contained in a separate 15 mL vial pre-purged of air with argon. PhSiH<sub>3</sub> (250 μL) was added to the remaining CHCl<sub>3</sub> (~4 mL) whilst still bubbling with a stream of argon. Pd(PPh<sub>3</sub>)<sub>4</sub> (250 mg) was then added and the mixture was shaken until a homogeneous solution was achieved. The resin was then soaked in the Pd(PPh<sub>3</sub>)<sub>4</sub> solution for 2 hours, with gentle agitation, filtered through a sintered glass funnel, and washed with CH<sub>2</sub>Cl<sub>2</sub> (3 x 3 mL) and DMF (3 x 3 mL) to remove the catalyst. The resin was then soaked in Quasar<sup>®</sup> 670 carboxylic acid (1 eq. to resin loading), dissolved in DMF (2 mL) along with HBTU (1 eq. to resin loading), HOBt (1 eq. to resin loading), DMAP (0.1 eq. to resin loading) and DIPEA (2.5 eq. to resin loading), for 2 hours with occasional stirring and excluded from light. The resin was subsequently washed with DMF (2 x 3 mL), CH<sub>2</sub>Cl<sub>2</sub> (2 x 3 mL), Et<sub>2</sub>O (2 x 4 mL), air dried and subsequently cleaved from the resin.

Cleavage was performed on the resin (0.1 mmol), by treating the resin with a cleavage solution (10 mL) comprising of H<sub>2</sub>O (2.5 % v/v), triisopropylsilane (2.5 % v/v) in CF<sub>3</sub>COOH, for 2 hours. CF<sub>3</sub>COOH was then evaporated under a stream of N<sub>2</sub> and the peptide was precipitated

by addition of Et<sub>2</sub>O (50 mL). The precipitate was filtered and dissolved in 50 % aqueous CH<sub>3</sub>CN for lyophilisation. The peptide was redissolved in 60-70 % aqueous CH<sub>3</sub>CN (5 mL) and purified by injecting the sample onto a reverse-phase preparative column, eluted over a 55 min gradient from 20 to 85 % solvent B, (solvent A: 0.1 % TFA/H<sub>2</sub>O; solvent B: 0.1 % TFA/CH<sub>3</sub>CN) with a flow rate of 6 mL/min. The fractions were collected and analysed for purity by injecting the samples onto a reverse-phase analytical column, eluted over a 45 min gradient from 0 to 70 % solvent B, (solvent A: 0.1 % TFA/H<sub>2</sub>O; solvent B: 0.1 % TFA/CH<sub>3</sub>CN) with a flow rate of 1 mL/min. The pure fractions were pooled to afford AcβAlaC14Cy5βLysOH trifluoroacetate **4** (13 mg, 10 % yield) or AcβAlaC14βLysβAlaOH trifluoroacetate **5** (30 mg, 42 % yield).<sup>1,2</sup>

## Synthesis of Lys-D-Ala-D-Ala variant

### Synthesis of Gly-Gly-Gly-Lys-D-Ala-D-Ala (**6**)

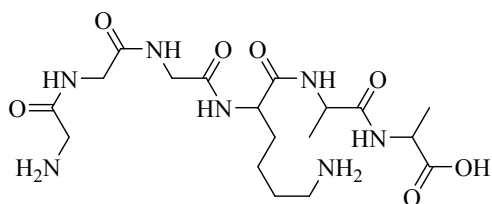

**(6)**

The peptide was synthesised on a 0.10 mmol scale using standard Fmoc chemistry on Wang resin as described above. The peptides were then cleaved and purified by injecting them onto a reverse-phase preparative column, eluted over a 55 min gradient from 0 to 20 % solvent B (solvent A: 0.1 % TFA/H<sub>2</sub>O; solvent B: 0.1 % TFA/CH<sub>3</sub>CN) with a flow rate of 6 mL/min. The pure fractions were pooled to afford Gly-Gly-Gly-Lys-D-Ala-D-Ala trifluoroacetate (**6**) (23 mg, 33 % yield).

# Peptide characterisation data

## <sup>1</sup>H NMR Spectra

### <sup>1</sup>H NMR of propargyl Vancomycin (1)

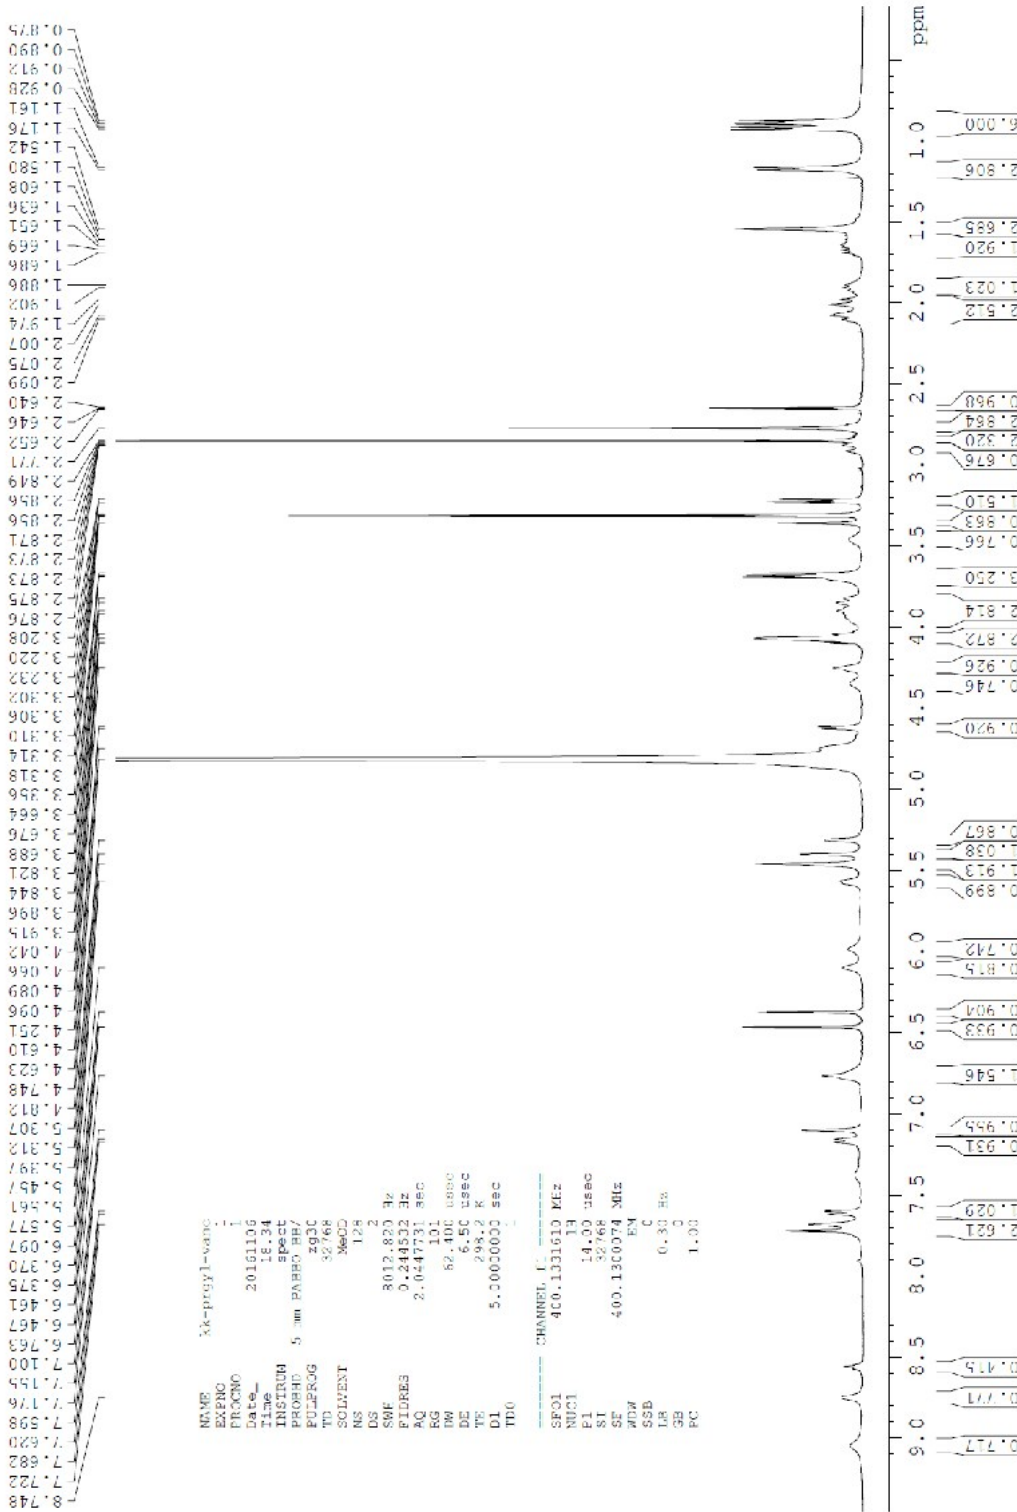

$^1\text{H}$  NMR of  $\beta$  tri-peptide Ac $\beta$ SerAzAlaOH (2)

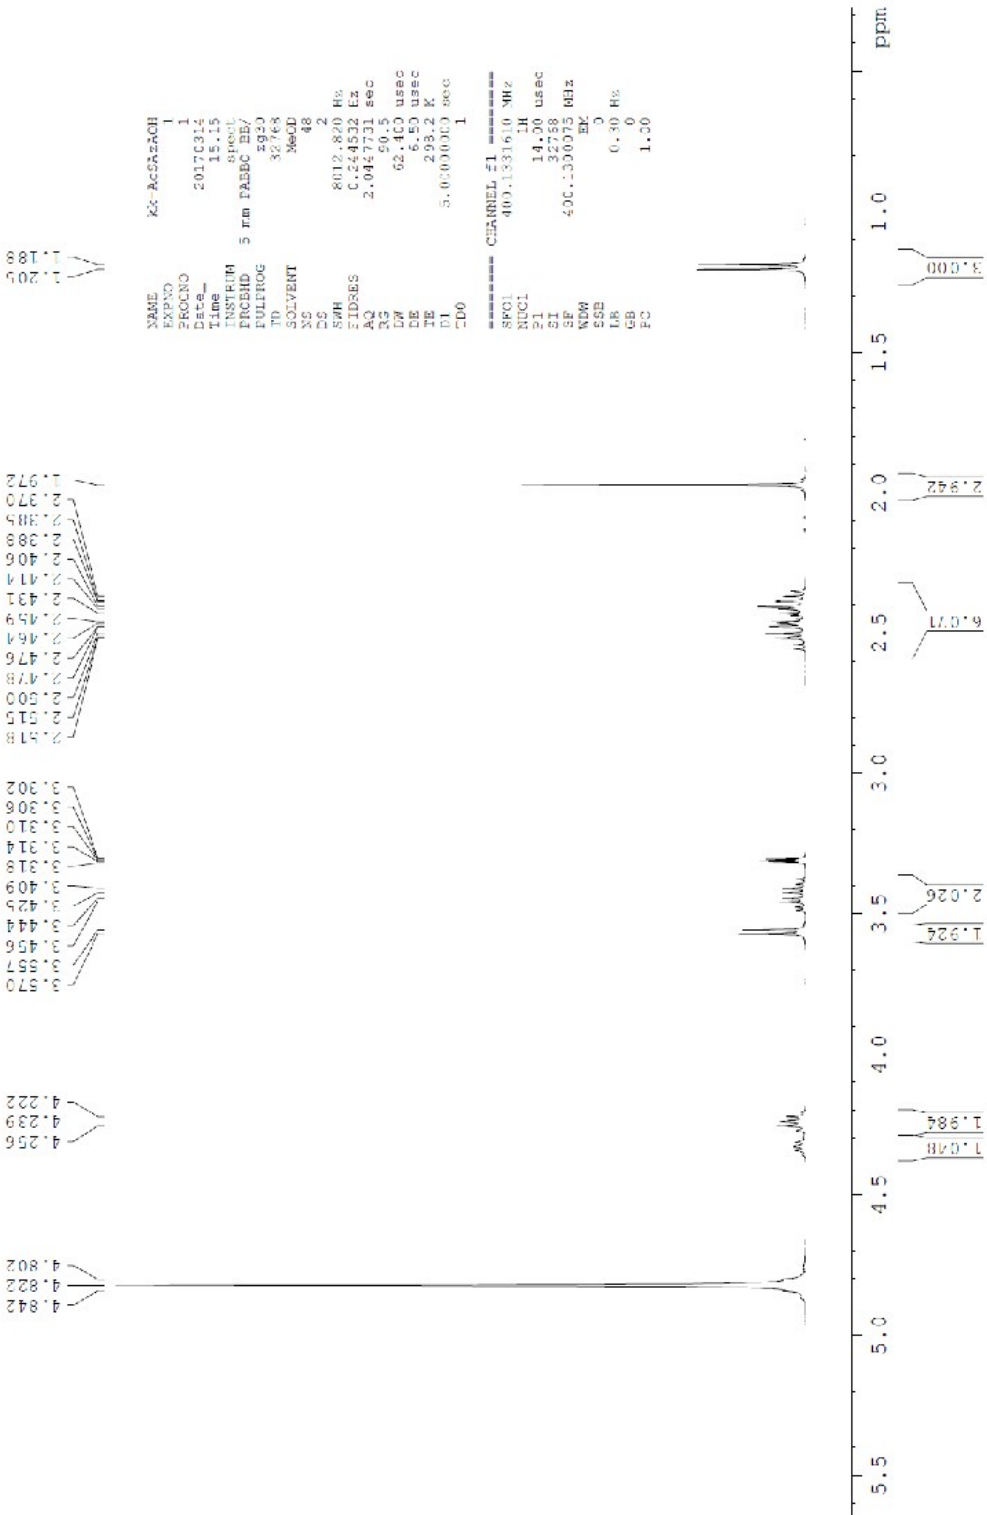



**<sup>1</sup>H NMR of clicked product AcβSerAz(Vancomycin)βAlaOH (3)**

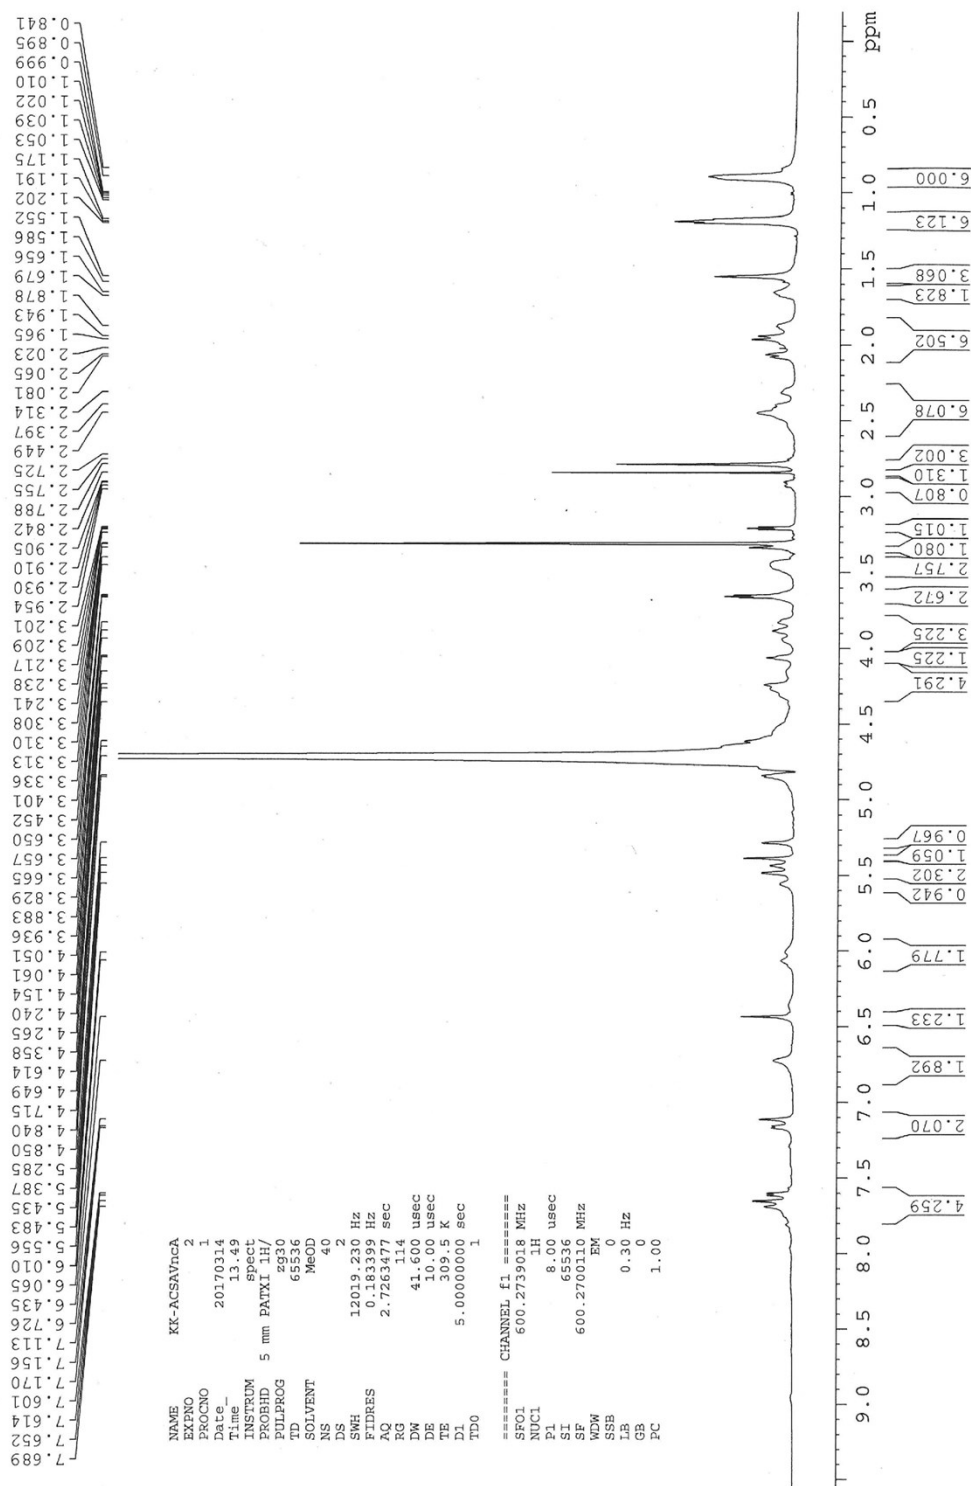

<sup>1</sup>H NMR stack of AcβSerAzAlaOH (1), propargyl Vancomycin (2) and AcβSerAz(Vancomycin)βAlaOH (3)

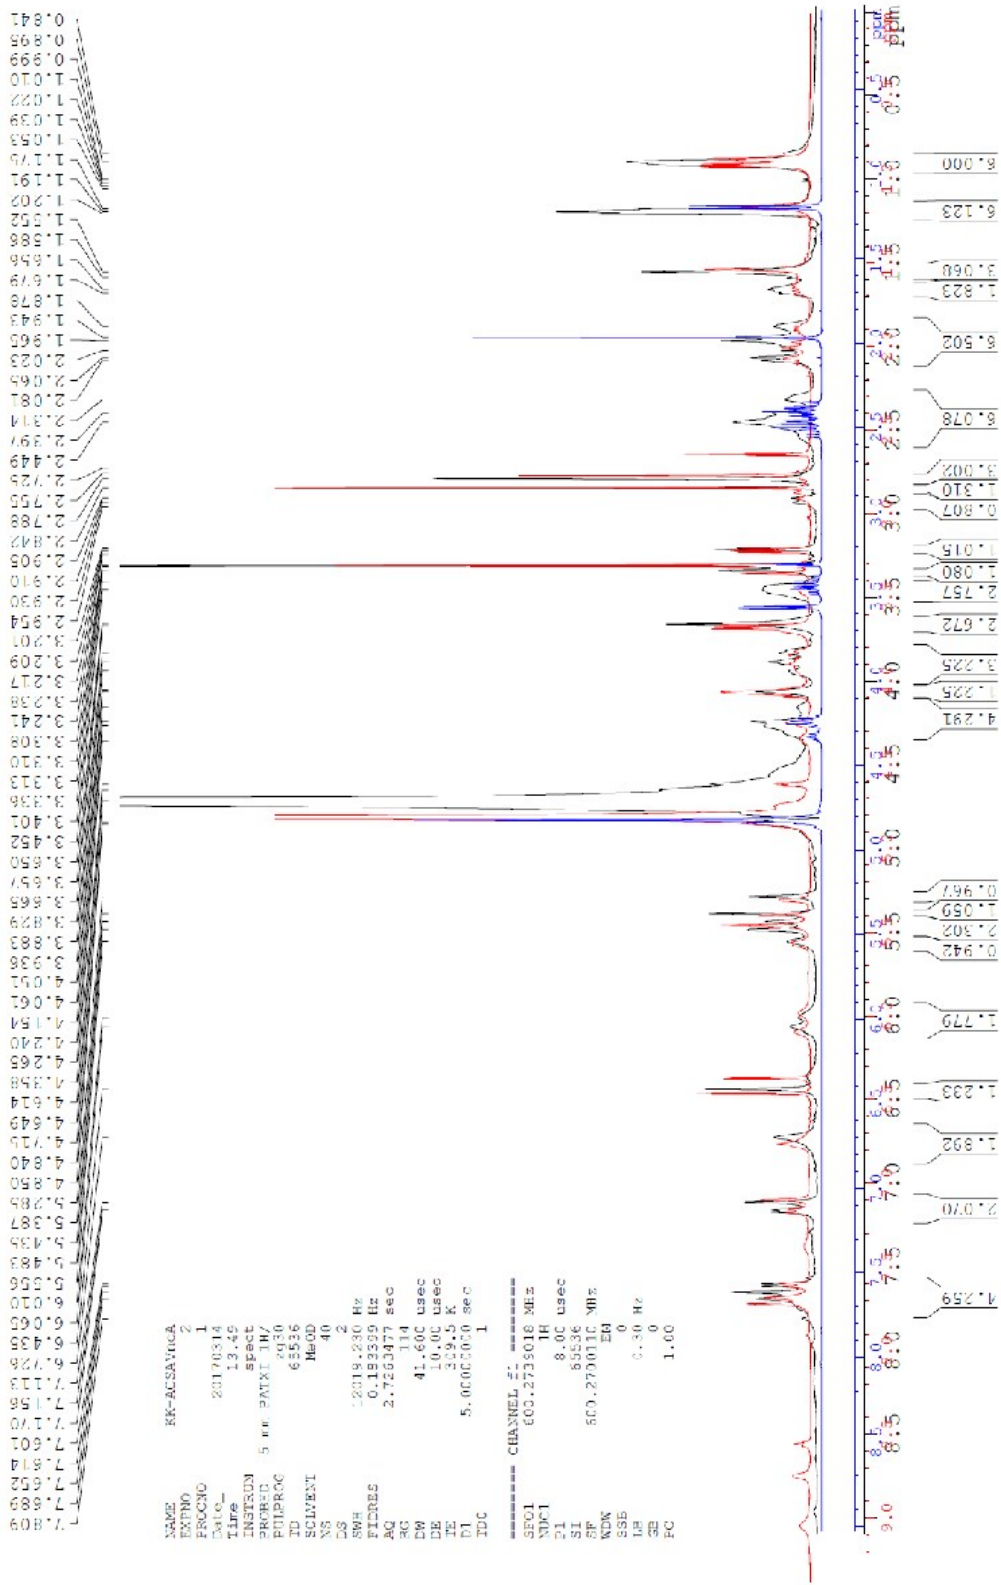

# Mass Spectra

## Accurate MS analysis of propargyl Vancomycin (1)

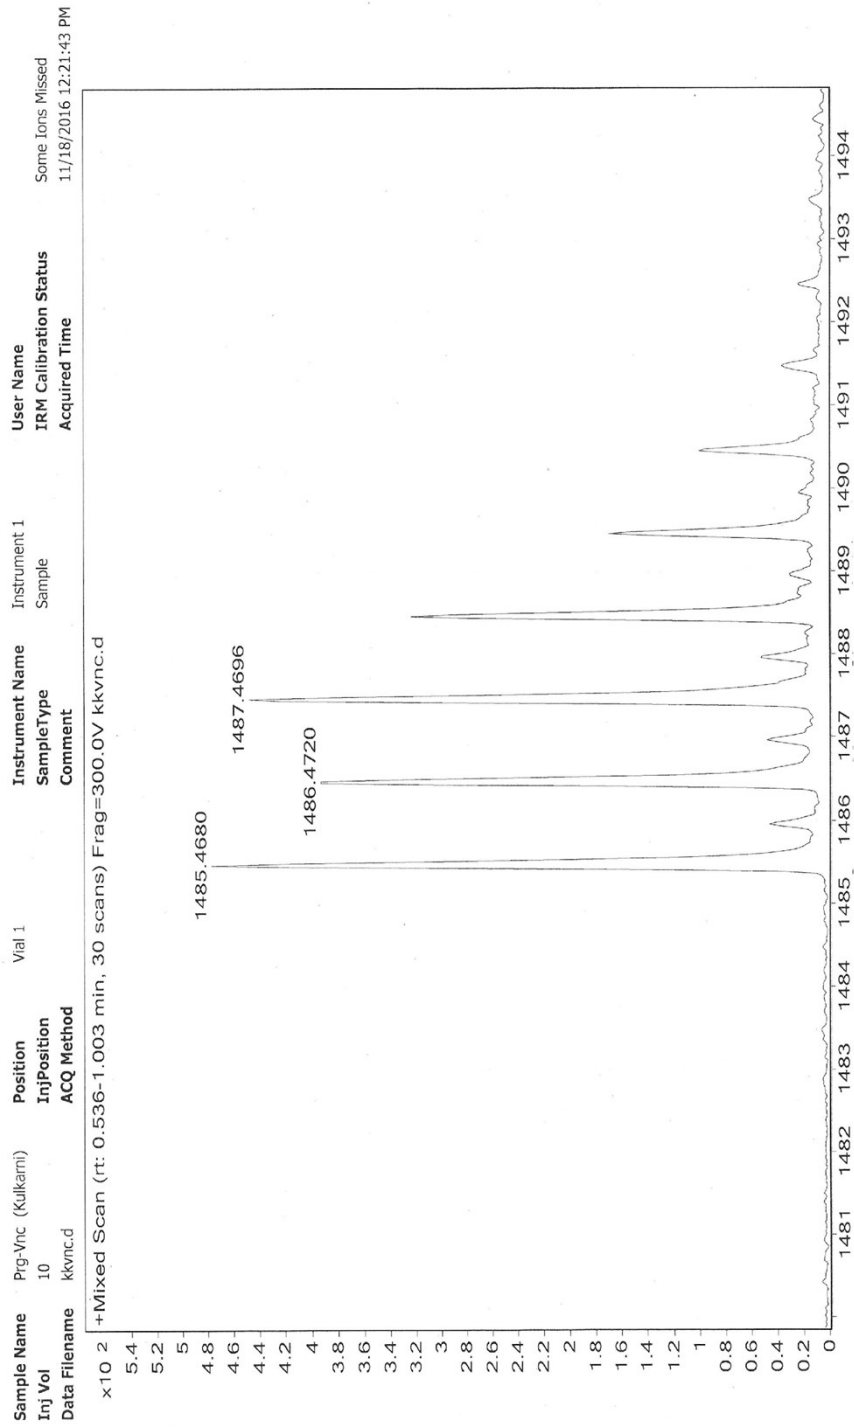

### MS analysis of AcβSerAzAlaOH (2)

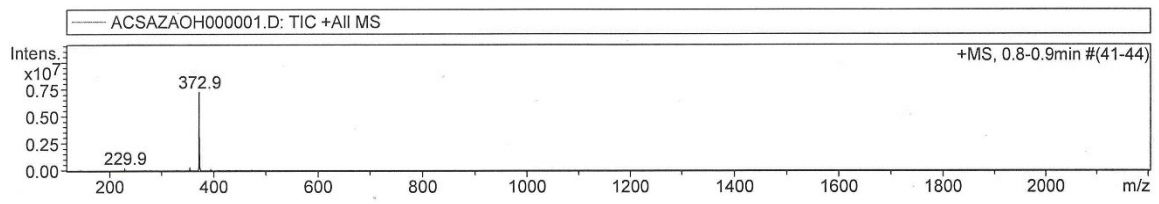

### Accurate MS analysis of clicked product AcβSerAz(Vancomycin)βAlaOH (3)

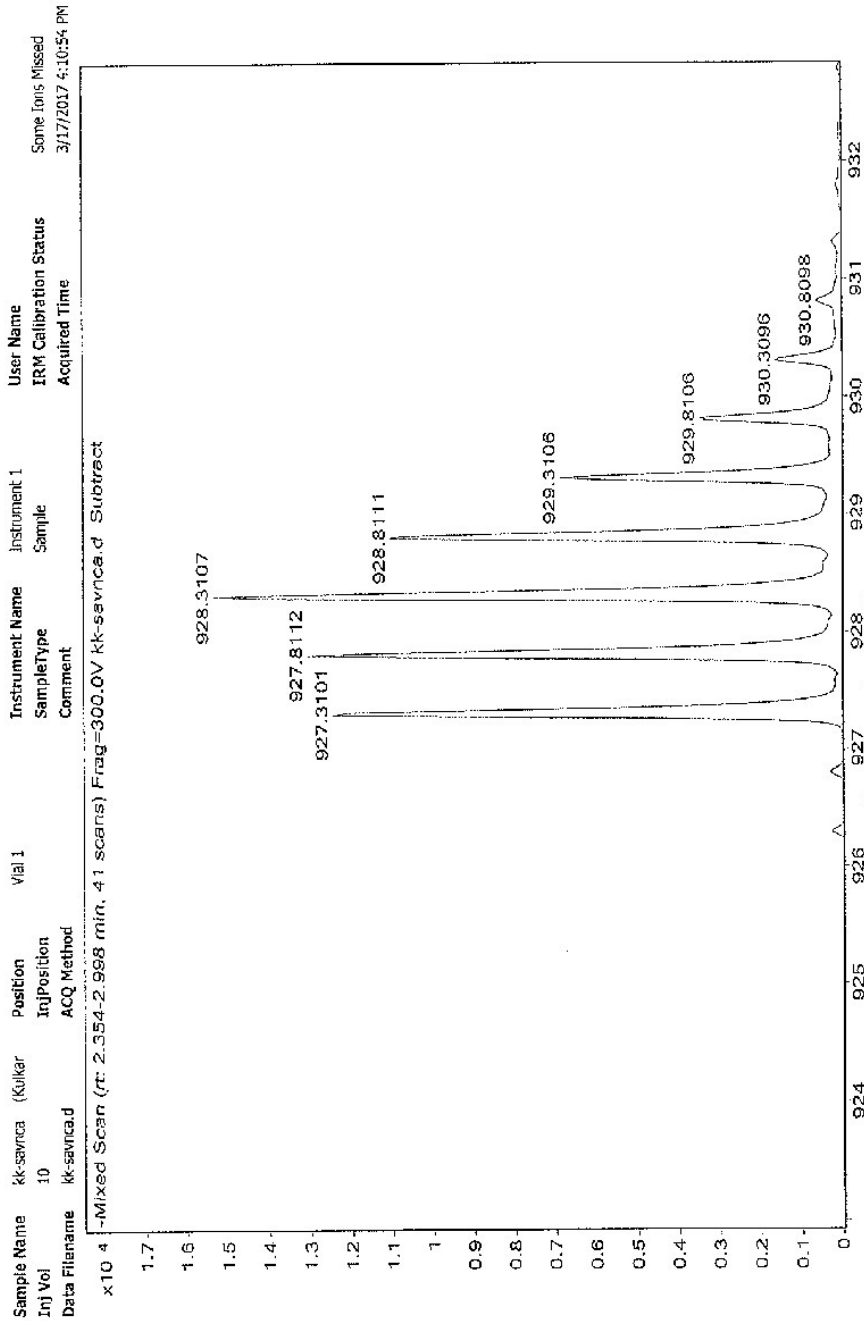

Sample Name: kk-savncad (Kulkar)  
 Inj Vol: 10  
 Data Filename: kk-savncad

Position: InjPosition  
 ACQ Method

Vial 1

Instrument Name: Instrument 1  
 Sample Type: Sample  
 Comment

User Name: User Name  
 IRM Calibration Status: IRM Calibration Status  
 Acquired Time: Acquired Time

Some Ions Missed: Some Ions Missed  
 3/17/2017 4:10:54 PM

### Accurate MS analysis of clicked product Ac $\beta$ SerAz(Vancomycin) $\beta$ AlaOH (3)

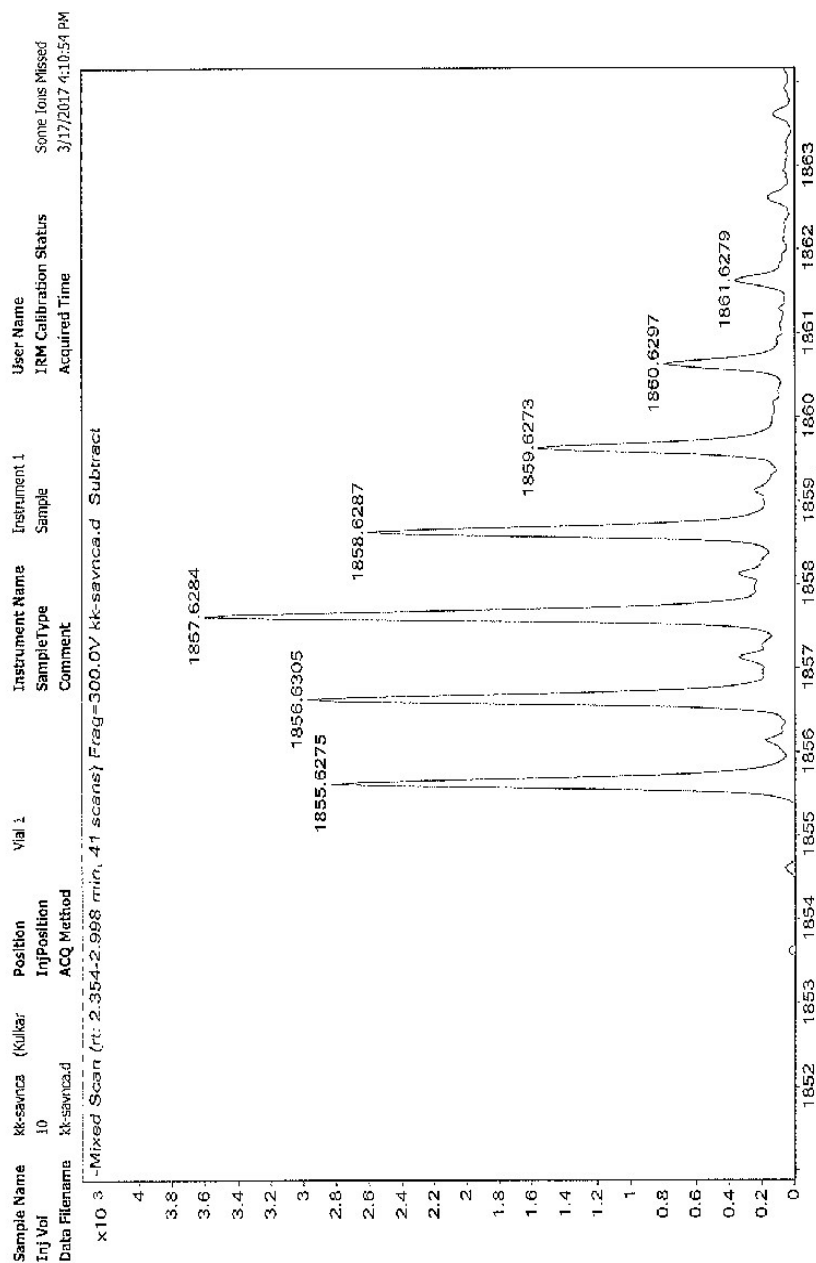

### MS analysis of Ac $\beta$ AlaC14Cy5 $\beta$ LysOH (4)

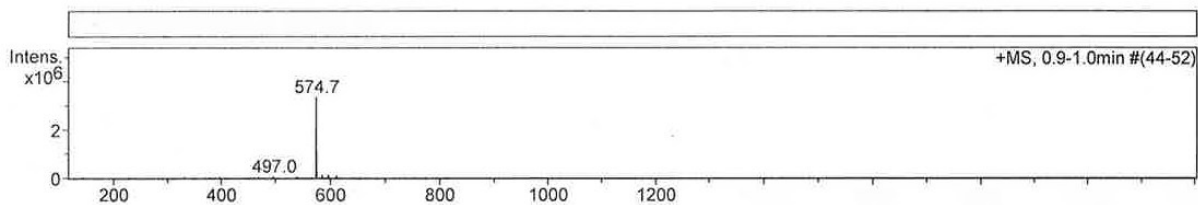

### MS analysis of Ac $\beta$ AlaC14 $\beta$ Lys $\beta$ AlaOH (5)

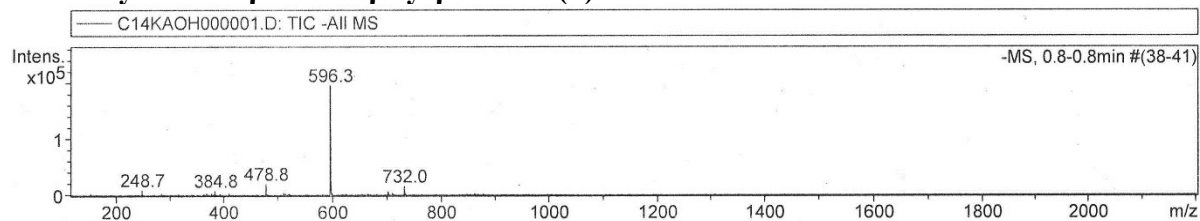

### MS analysis of GlyGlyGlyLysAlaAla (6)

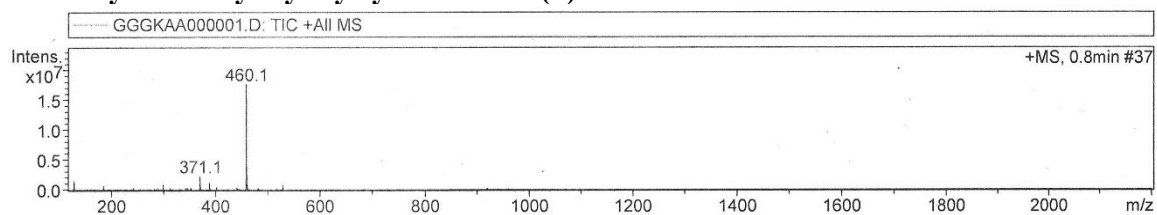

### HPLC traces

#### HPLC analysis of propargyl Vancomycin (1)

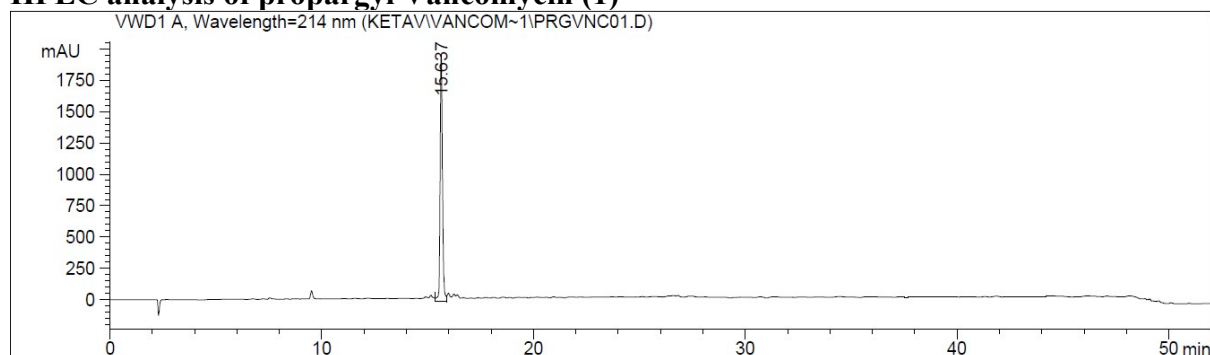

#### HPLC analysis of Ac $\beta$ SerAzAlaOH (2)

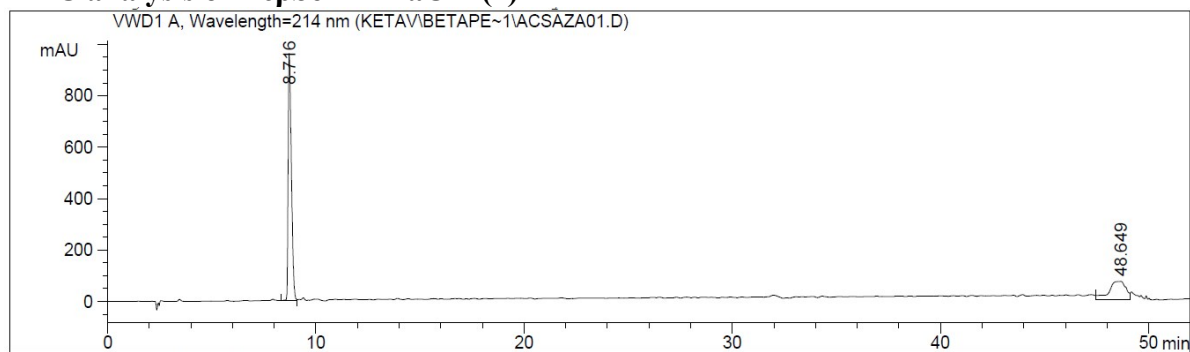

### HPLC analysis of clicked product AcSerAz(Vancomycin)AlaOH (3)

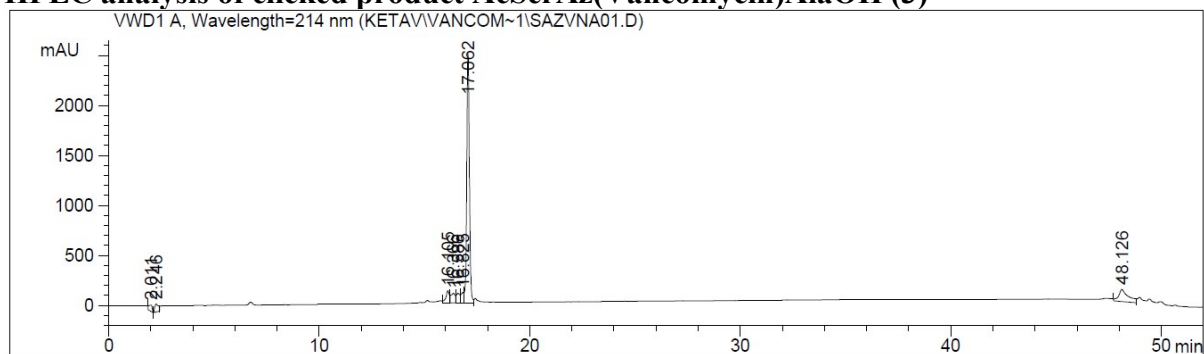

### HPLC analysis of Ac $\beta$ AlaC14Cy5 $\beta$ LysOH (4)

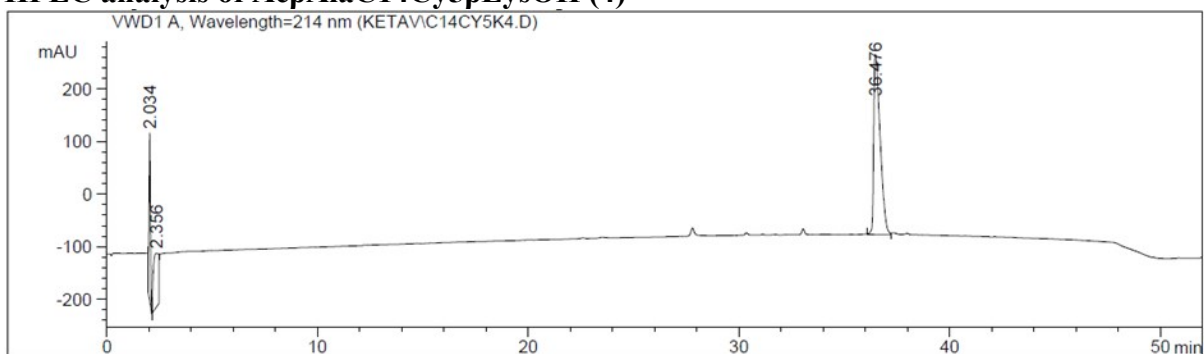

### HPLC analysis of Ac $\beta$ AlaC14 $\beta$ Lys $\beta$ AlaOH (5)

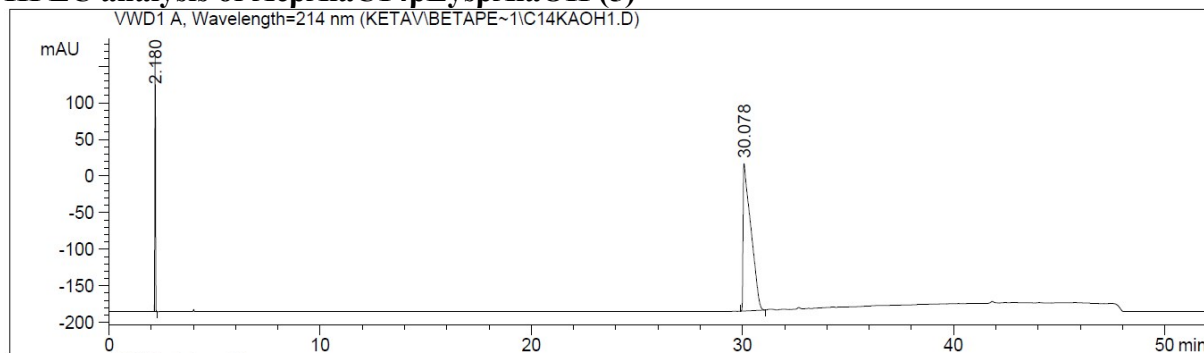

## Video Files

Link for ESI Video 1 can be found [HERE](#)

Link for ESI Video 2 can be found [HERE](#)
